# Supplementary material for: Lactiplantibacillus argentoratensis and Candida tropicalis Isolated from the Gastrointestinal Tract of Fish Exhibited Inhibitory Effects against Pathogenic Bacteria of Nile Tilapia
Source: MDPI journal article supplement (doi:10.3390/vetsci10020129), 2023-02-07
Supplement: s1 [file s1]

**Supplemental Table S9: The GenBank accession numbers and NCBI links of each identified probiotic isolate.**

| Isolate | Species                                    | Accession number | NCBI link                                                                                                 |
|---------|--------------------------------------------|------------------|-----------------------------------------------------------------------------------------------------------|
| CE1/1   | <i>Weissella paramesenteroides</i>         | LC735573         | <a href="https://www.ncbi.nlm.nih.gov/nuccore/LC735573">https://www.ncbi.nlm.nih.gov/nuccore/LC735573</a> |
| CS1/3   | <i>Weissella paramesenteroides</i>         | LC735574         | <a href="https://www.ncbi.nlm.nih.gov/nuccore/LC735574">https://www.ncbi.nlm.nih.gov/nuccore/LC735574</a> |
| AT8/5   | <i>Lactiplantibacillus argentoratensis</i> | LC735575         | <a href="https://www.ncbi.nlm.nih.gov/nuccore/LC735575">https://www.ncbi.nlm.nih.gov/nuccore/LC735575</a> |
| YCS1/1  | <i>Kodamaea ohmeri</i>                     | LC735679         | <a href="https://www.ncbi.nlm.nih.gov/nuccore/LC735679">https://www.ncbi.nlm.nih.gov/nuccore/LC735679</a> |
| YCS1/3  | <i>Kodamaea ohmeri</i>                     | LC735680         | <a href="https://www.ncbi.nlm.nih.gov/nuccore/LC735680">https://www.ncbi.nlm.nih.gov/nuccore/LC735680</a> |
| YON3/2  | <i>Candida tropicalis</i>                  | LC735681         | <a href="https://www.ncbi.nlm.nih.gov/nuccore/LC735681">https://www.ncbi.nlm.nih.gov/nuccore/LC735681</a> |
